# Supplementary material
Source: Springer Nature journal article supplement (https://www.springermedizin.de/resource/supplementary/12955_2011_847_MOESM3_ESM.pdf/9561382)

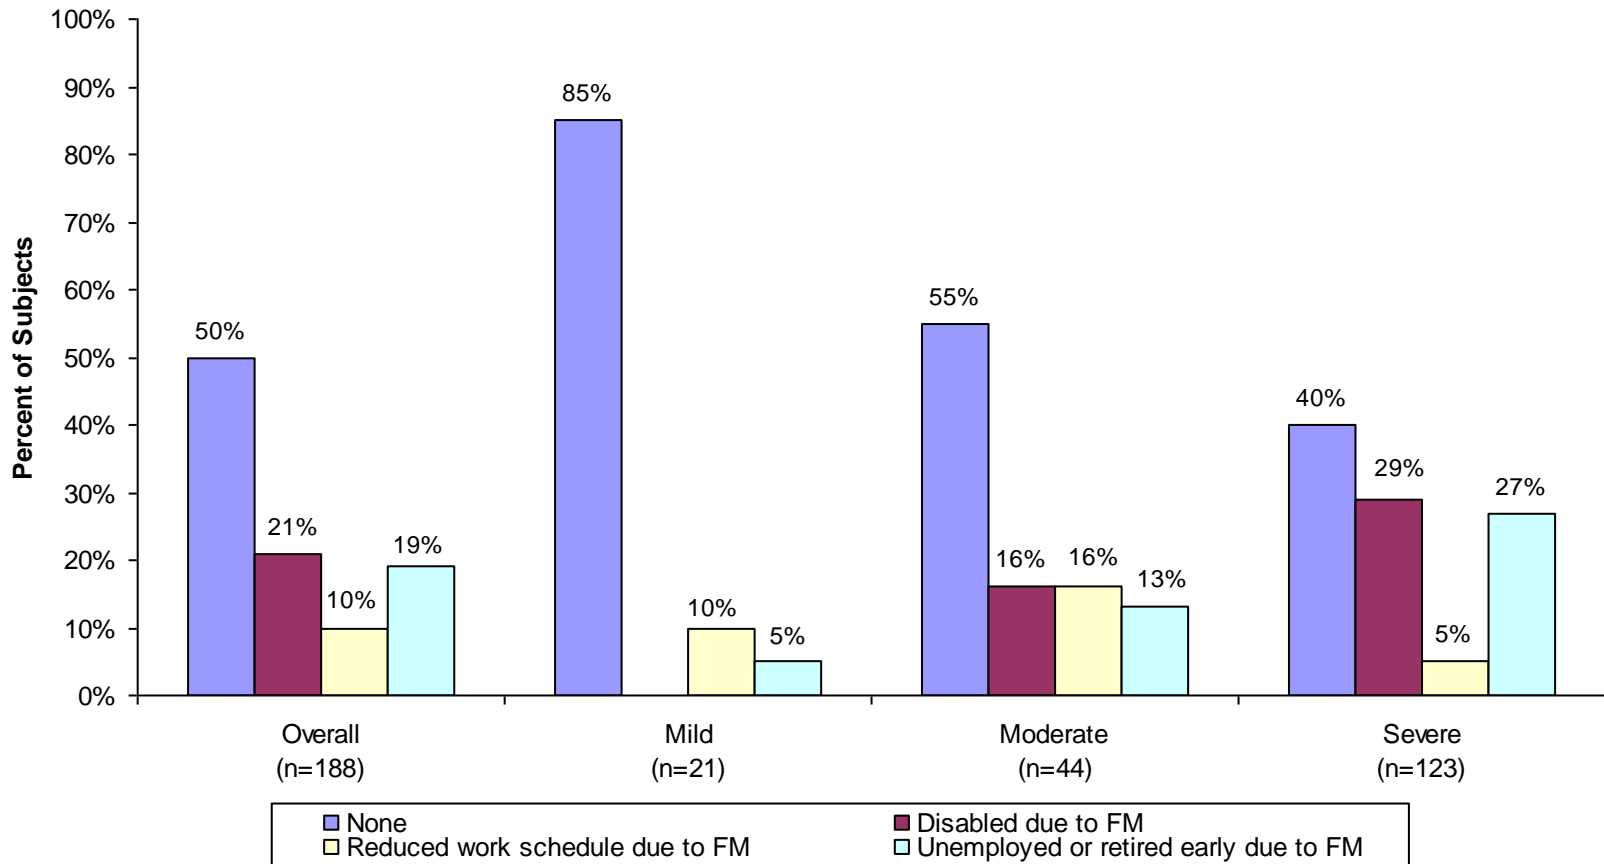

Supplement: MOESM3 [file 9561382]
